# Supplementary material for: In-Depth Investigation of Archival and Prospectively Collected Samples Reveals No Evidence for XMRV Infection in Prostate Cancer
Source: PubMed Central journal article supplement (PMC3445615; doi:10.1371/journal.pone.0044954), 2012-09-18

**A**

**22RV1 XMRV**

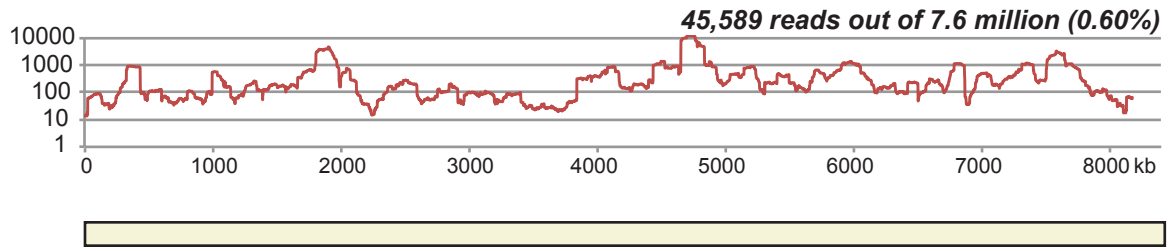

**B**

**MLV-LNCaP**

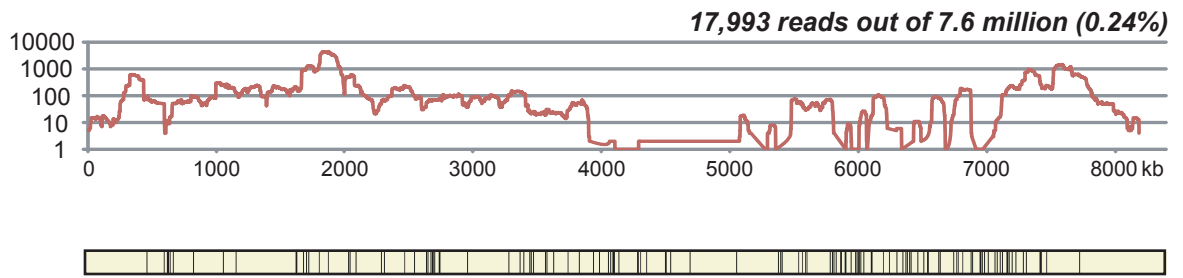

Supplement: pone.0044954.s001.pdf [file pone.0044954.s001.pdf]
