# Supplementary material for: In-Depth Investigation of Archival and Prospectively Collected Samples Reveals No Evidence for XMRV Infection in Prostate Cancer
Source: PubMed Central journal article supplement (PMC3445615; doi:10.1371/journal.pone.0044954), 2012-09-18
Supplement: pone.0044954.s002.pdf [file pone.0044954.s002.pdf]

| Polymorphism | Position | 22Rv1 Coverage | 22Rv1 Variant Frequency | 22Rv1 Variant P-Value | LNCaP Coverage | LNCaP Variant Frequency | VP35 Coverage | VP35 Variant Frequency | VP42 Coverage | VP42 Variant Frequency | VP62 Coverage | VP62 Variant Frequency |
|--------------|----------|----------------|-------------------------|-----------------------|----------------|-------------------------|---------------|------------------------|---------------|------------------------|---------------|------------------------|
| G→A          | 4264     | 112            | 38.4%                   | 5.9E-120              | 128            | 4.8%                    | 15            | 20.0%                  | 114           | 29.8%                  | 25            | 16.0%                  |
| C→G          | 8112     | 26             | 34.6%                   | 7.6E-27               | 5              | 0.0%                    | -             | 0.0%                   | 33            | 27.3%                  | 16            | 25.0%                  |
| C→T          | 3376     | 90             | 21.1%                   | 9E-54                 | 142            | 0.0%                    | -             | 0.0%                   | 10            | 0.0%                   | 3             | 0.0%                   |
| T→C          | 164      | 35             | 11.4%                   | 1.5E-09               | 10             | 0.0%                    | 29            | 0.0%                   | 34            | 0.0%                   | -             | 0.0%                   |
| G→C          | 8100     | 27             | 7.4%                    | 0.0000096             | 6              | 0.0%                    | -             | 0.0%                   | 48            | 0.0%                   | 19            | 0.0%                   |
| T→C          | 5580     | 161            | 5.0%                    | 9E-16                 | 99             | 1.0%                    | 20            | 0.0%                   | 151           | 0.7%                   | 23            | 4.3%                   |
| T→C          | 2918     | 44             | 4.5%                    | 0.000000067           | 47             | 0.0%                    | 17            | 5.9%                   | 130           | 1.5%                   | 17            | 5.9%                   |
| T→C          | 3418     | 45             | 4.4%                    | 0.000000033           | 44             | 0.0%                    | 3             | 0.0%                   | 33            | 0.0%                   | 3             | 0.0%                   |
| T→C          | 199      | 25             | 4.0%                    | 0.00012               | 13             | 0.0%                    | 34            | 0.0%                   | 42            | 0.0%                   | 1             | 0.0%                   |
| A→G          | 3546     | 25             | 4.0%                    | 0.000097              | 24             | 0.0%                    | -             | 0.0%                   | 29            | 0.0%                   | 1             | 0.0%                   |
| G→A          | 7412     | 684            | 3.8%                    | 7.3E-43               | 369            | 1.4%                    | 85            | 0.0%                   | 897           | 0.2%                   | 206           | 0.0%                   |
| C→T          | 8042     | 52             | 3.8%                    | 0.00000033            | 22             | 0.0%                    | 9             | 0.0%                   | 468           | 0.4%                   | 110           | 0.0%                   |
| A→G          | 2282     | 28             | 3.6%                    | 0.00025               | 49             | 0.0%                    | 11            | 0.0%                   | 78            | 0.0%                   | 3             | 0.0%                   |
| T→A          | 2662     | 55             | 3.6%                    | 0.0000008             | 72             | 0.0%                    | 19            | 0.0%                   | 55            | 0.0%                   | 9             | 0.0%                   |
| G→A          | 4819     | 4445           | 3.6%                    | 6.3E-337              | 2561           | 0.9%                    | 74            | 1.4%                   | 144           | 0.7%                   | 15            | 0.0%                   |
| A→G          | 790      | 58             | 3.4%                    | 0.00016               | 60             | 18.3%                   | 123\          | 14.6%                  | 459           | 16.1%                  | 44            | 13.6%                  |
| G→A          | 1147     | 65             | 3.1%                    | 0.0000014             | 148            | 0.0%                    | 3             | 0.0%                   | 24            | 0.0%                   | 2             | 0.0%                   |
| A→G          | 3484     | 32             | 3.1%                    | 0.00039               | 21             | 0.0%                    | -             | 0.0%                   | 27            | 0.0%                   | 1             | 0.0%                   |
| A→G          | 6517     | 64             | 3.1%                    | 0.000083              | 30             | 0.0%                    | 29            | 0.0%                   | 409           | 0.2%                   | 16            | 0.0%                   |
