# Supplementary material for: In-Depth Investigation of Archival and Prospectively Collected Samples Reveals No Evidence for XMRV Infection in Prostate Cancer
Source: PubMed Central journal article supplement (PMC3445615; doi:10.1371/journal.pone.0044954), 2012-09-18
Supplement: pone.0044954.s003.pdf [file pone.0044954.s003.pdf]

| Polymorphism | Position | LNCaP Coverage | LNCaP Variant Frequency | LNCaP Variant P-Value | 22Rv1 Coverage | 22Rv1 Variant Frequency2 | VP35 Coverage | VP35 Variant Frequency | VP42 Coverage | VP42 Variant Frequency | VP62 Coverage | VP62 Variant Frequency |
|--------------|----------|----------------|-------------------------|-----------------------|----------------|--------------------------|---------------|------------------------|---------------|------------------------|---------------|------------------------|
| C→G          | 790      | 60             | 18.3%                   | 8.60E-31              | 58             | 3.4%                     | 123           | 14.6%                  | 459           | 16.1%                  | 49            | 13.6%                  |
| G→A          | 4264     | 128            | 14.8%                   | 5.30E-43              | 112            | 38.4%                    | 15            | 20.0%                  | 114           | 29.8%                  | 25            | 16.0%                  |
| G→T          | 247      | 27             | 11.1%                   | 3.10E-08              | 80             | 3.8%                     | 24            | 4.2%                   | 66            | 4.5%                   | 1             | 0.0%                   |
| G→A          | 5551     | 212            | 8.5%                    | 3.30E-36              | 177            | 3.4%                     | 20            | 0.0%                   | 231           | 3.9%                   | 23            | 0.0%                   |
| G→A          | 2905     | 100            | 5.0%                    | 4.40E-15              | 137            | 0.7%                     | 17            | 0.0%                   | 133           | 3.8%                   | 17            | 0.0%                   |
| T→C          | 3758     | 41             | 4.9%                    | 0.000062              | 27             | 0.0%                     | -             | 0.0%                   | 19            | 0.0%                   | 1             | 0.0%                   |
| G→A          | 3181     | 90             | 4.4%                    | 8.20E-10              | 89             | 4.5%                     | -             | 0.0%                   | 24            | 4.2%                   | 6             | 0.0%                   |
| T→C          | 2925     | 47             | 4.3%                    | 1.50E-07              | 43             | 0.0%                     | 23            | 4.3%                   | 127           | 0.0%                   | 18            | 0.0%                   |
| G→A          | 2830     | 96             | 4.2%                    | 8.50E-08              | 105            | 0.0%                     | 23            | 8.7%                   | 158           | 5.1%                   | 13            | 0.0%                   |
| G→A          | 2923     | 48             | 4.2%                    | 0.000071              | 43             | 0.0%                     | 18            | 0.0%                   | 126           | 4.8%                   | 17            | 0.0%                   |
| A→G          | 7943     | 48             | 4.2%                    | 2.80E-07              | 100            | 1.0%                     | 15            | 0.0%                   | 161           | 0.0%                   | 79            | 0.0%                   |
| C→T          | 3464     | 25             | 4.0%                    | 0.00012               | 29             | 0.0%                     | -             | 0.0%                   | 38            | 0.0%                   | 1             | 0.0%                   |
| G→A          | 7916     | 50             | 4.0%                    | 0.00012               | 110            | 0.0%                     | 30            | 0.0%                   | 299           | 0.3%                   | 86            | 0.0%                   |
| A→C          | 3557     | 26             | 3.8%                    | 0.0073                | 28             | 0.0%                     | -             | 0.0%                   | 29            | 0.0%                   | 2             | 0.0%                   |
| G→A          | 6255     | 160            | 3.8%                    | 5.50E-12              | 153            | 0.7%                     | 5             | 0.0%                   | 109           | 2.8%                   | 38            | 13.2%                  |
| G→A          | 664      | 54             | 3.7%                    | 5.80E-08              | 47             | 0.0%                     | 65            | 3.1%                   | 474           | 2.1%                   | 17            | 5.9%                   |
| G→A          | 3835     | 55             | 3.6%                    | 0.00006               | 49             | 0.0%                     | -             | 0.0%                   | 23            | 0.0%                   | -             | 0.0%                   |
| G→A          | 5562     | 138            | 3.6%                    | 3.90E-09              | 120            | 1.7%                     | 21            | 0.0%                   | 183           | 1.1%                   | 19            | 0.0%                   |
| C→T          | 3214     | 58             | 3.4%                    | 0.000075              | 54             | 0.0%                     | 5             | 0.0%                   | 57            | 0.0%                   | 2             | 0.0%                   |
| G→A          | 3234     | 58             | 3.4%                    | 1.3E-09               | 52             | 1.9%                     | 3             | 0.0%                   | 54            | 9.3%                   | 1             | 0.0%                   |
| G→A          | 472      | 60             | 3.3%                    | 0.00000001            | 47             | 4.3%                     | 85            | 0.0%                   | 125           | 0.0%                   | 8             | 0.0%                   |
| G→A          | 3031     | 90             | 3.3%                    | 9.4E-09               | 97             | 2.1%                     | 7             | 0.0%                   | 58            | 1.7%                   | 3             | 0.0%                   |
| G→A          | 3059     | 64             | 3.1%                    | 4.90E-08              | 86             | 1.2%                     | 2             | 0.0%                   | 20            | 5.0%                   | 4             | 0.0%                   |
| G→A          | 5703     | 589            | 3.1%                    | 1.20E-33              | 548            | 2.9%                     | 4             | 0.0%                   | 118           | 9.3%                   | 13            | 0.0%                   |
| G→A          | 5637     | 100            | 3.0%                    | 9.1E-10               | 100            | 1.0%                     | 28            | 14.3%                  | 200           | 0.5%                   | 27            | 0.0%                   |
